# Supplementary material
Source: publisher figshare collection journal article supplement (https://acs.figshare.com/ndownloader/files/4568797)
Supplement: Supplementary file 1 [file 4568797]

data_pascal5m

 

_audit_creation_method            SHELXL-97

_chemical_name_systematic

;

 ?

;

_chemical_name_common             ?

_chemical_melting_point           ?

_chemical_formula_moiety          ?

_chemical_formula_sum

 'C59 H69 Cl4 N5 P2 Zr'

_chemical_formula_weight          1143.15

 

loop_

 _atom_type_symbol

 _atom_type_description

 _atom_type_scat_dispersion_real

 _atom_type_scat_dispersion_imag

 _atom_type_scat_source

 'C'  'C'   0.0033   0.0016

 'International Tables Vol C Tables 4.2.6.8 and 6.1.1.4'

 'H'  'H'   0.0000   0.0000

 'International Tables Vol C Tables 4.2.6.8 and 6.1.1.4'

 'N'  'N'   0.0061   0.0033

 'International Tables Vol C Tables 4.2.6.8 and 6.1.1.4'

 'P'  'P'   0.1023   0.0942

 'International Tables Vol C Tables 4.2.6.8 and 6.1.1.4'

 'Zr'  'Zr'  -2.9673   0.5597

 'International Tables Vol C Tables 4.2.6.8 and 6.1.1.4'

 'Cl'  'Cl'   0.1484   0.1585

 'International Tables Vol C Tables 4.2.6.8 and 6.1.1.4'

 

_symmetry_cell_setting            Triclinic

_symmetry_space_group_name_H-M    P-1

 

loop_

 _symmetry_equiv_pos_as_xyz

 'x, y, z'

 '-x, -y, -z'

 

_cell_length_a                    10.0482(10)

_cell_length_b                    14.0223(14)

_cell_length_c                    21.011(2)

_cell_angle_alpha                 94.687(2)

_cell_angle_beta                  103.329(2)

_cell_angle_gamma                 91.388(2)

_cell_volume                      2868.2(5)

_cell_formula_units_Z             2

_cell_measurement_temperature     173(2)

_cell_measurement_reflns_used     4092

_cell_measurement_theta_min       2.49

_cell_measurement_theta_max       24.08

 

_exptl_crystal_description        block

_exptl_crystal_colour             clear

_exptl_crystal_size_max           0.60

_exptl_crystal_size_mid           0.40

_exptl_crystal_size_min           0.20

_exptl_crystal_density_meas       0

_exptl_crystal_density_diffrn     1.324

_exptl_crystal_density_method     'not measured'

_exptl_crystal_F_000              1192

_exptl_absorpt_coefficient_mu     0.476

_exptl_absorpt_correction_type    'semi-empirical'

_exptl_absorpt_correction_T_min   0.625121

_exptl_absorpt_correction_T_max   1.000000

_exptl_absorpt_process_details    'SADABS (Bruker-AXS)'

 

_exptl_special_details

;

 ?

;

 

_diffrn_ambient_temperature       173(2)

_diffrn_radiation_wavelength      0.71073

_diffrn_radiation_type            MoK\a

_diffrn_radiation_source          'fine-focus sealed tube'

_diffrn_radiation_monochromator   graphite

_diffrn_measurement_device_type   'CCD area detector'

_diffrn_measurement_method        'phi and omega scans'

_diffrn_detector_area_resol_mean  ?

_diffrn_standards_number          ?

_diffrn_standards_interval_count  ?

_diffrn_standards_interval_time   ?

_diffrn_standards_decay_%         ?

_diffrn_reflns_number             19734

_diffrn_reflns_av_R_equivalents   0.0521

_diffrn_reflns_av_sigmaI/netI     0.0794

_diffrn_reflns_limit_h_min        -11

_diffrn_reflns_limit_h_max        11

_diffrn_reflns_limit_k_min        -16

_diffrn_reflns_limit_k_max        16

_diffrn_reflns_limit_l_min        -24

_diffrn_reflns_limit_l_max        24

_diffrn_reflns_theta_min          5.10

_diffrn_reflns_theta_max          24.71

_reflns_number_total              9549

_reflns_number_gt                 6751

_reflns_threshold_expression      >2sigma(I)

 

_computing_data_collection        'Bruker SMART'

_computing_cell_refinement        'Bruker SMART'

_computing_data_reduction         'Bruker SAINT'

_computing_structure_solution     'SHELXS-97 (Sheldrick, 1990)'

_computing_structure_refinement   'SHELXL-97 (Sheldrick, 1997)'

_computing_molecular_graphics     'Bruker SHELXTL'

_computing_publication_material   'Bruker SHELXTL'

 

_refine_special_details

;

 Refinement of F^2^ against ALL reflections.  The weighted R-factor wR and

 goodness of fit S are based on F^2^, conventional R-factors R are based

 on F, with F set to zero for negative F^2^. The threshold expression of

 F^2^ > 2sigma(F^2^) is used only for calculating R-factors(gt) etc. and is

 not relevant to the choice of reflections for refinement.  R-factors based

 on F^2^ are statistically about twice as large as those based on F, and R-

 factors based on ALL data will be even larger.

;

 

_refine_ls_structure_factor_coef  Fsqd

_refine_ls_matrix_type            full

_refine_ls_weighting_scheme       calc

_refine_ls_weighting_details

 'calc w=1/[\s^2^(Fo^2^)+(0.0520P)^2^+0.0000P] where P=(Fo^2^+2Fc^2^)/3'

_atom_sites_solution_primary      direct

_atom_sites_solution_secondary    difmap

_atom_sites_solution_hydrogens    geom

_refine_ls_hydrogen_treatment     mixed

_refine_ls_extinction_method      none

_refine_ls_extinction_coef        ?

_refine_ls_number_reflns          9549

_refine_ls_number_parameters      712

_refine_ls_number_restraints      52

_refine_ls_R_factor_all           0.0777

_refine_ls_R_factor_gt            0.0465

_refine_ls_wR_factor_ref          0.1137

_refine_ls_wR_factor_gt           0.1011

_refine_ls_goodness_of_fit_ref    1.006

_refine_ls_restrained_S_all       1.004

_refine_ls_shift/su_max           0.026

_refine_ls_shift/su_mean          0.001

 

loop_

 _atom_site_label

 _atom_site_type_symbol

 _atom_site_fract_x

 _atom_site_fract_y

 _atom_site_fract_z

 _atom_site_U_iso_or_equiv

 _atom_site_adp_type

 _atom_site_occupancy

 _atom_site_symmetry_multiplicity

 _atom_site_calc_flag

 _atom_site_refinement_flags

 _atom_site_disorder_assembly

 _atom_site_disorder_group

Zr1 Zr 0.36438(3) 0.73025(3) 0.176759(17) 0.02412(12) Uani 1 1 d . . .

P1 P 0.66030(9) 0.82245(6) 0.23773(4) 0.0199(2) Uani 1 1 d . . .

P2 P 0.65876(9) 0.42290(6) 0.23747(4) 0.0209(2) Uani 1 1 d . . .

N1 N 0.5078(3) 0.83076(19) 0.24978(13) 0.0217(6) Uani 1 1 d . . .

N2 N 0.7940(3) 0.3687(2) 0.25722(13) 0.0241(7) Uani 1 1 d . . .

N3 N 0.2321(3) 0.8299(2) 0.13723(16) 0.0358(8) Uani 1 1 d . . .

N4 N 0.3715(3) 0.6531(2) 0.09219(14) 0.0295(7) Uani 1 1 d . . .

N5 N 0.2656(3) 0.6533(2) 0.23121(15) 0.0311(7) Uani 1 1 d . . .

C1 C 0.4683(3) 0.8974(2) 0.29720(17) 0.0230(8) Uani 1 1 d . . .

C2 C 0.4642(4) 0.8659(3) 0.35854(17) 0.0275(8) Uani 1 1 d . . .

C3 C 0.4138(4) 0.9277(3) 0.40226(18) 0.0348(10) Uani 1 1 d . . .

H3 H 0.4090 0.9067 0.4436 0.042 Uiso 1 1 calc R . .

C4 C 0.3708(4) 1.0176(3) 0.3879(2) 0.0379(10) Uani 1 1 d . . .

C5 C 0.3808(4) 1.0473(3) 0.32789(19) 0.0350(10) Uani 1 1 d . . .

H5 H 0.3540 1.1098 0.3178 0.042 Uiso 1 1 calc R . .

C6 C 0.4287(3) 0.9890(3) 0.28155(18) 0.0276(9) Uani 1 1 d . . .

C7 C 0.4415(4) 1.0277(3) 0.21860(18) 0.0347(9) Uani 1 1 d . . .

H7A H 0.5377 1.0454 0.2212 0.052 Uiso 1 1 calc R . .

H7B H 0.3866 1.0843 0.2115 0.052 Uiso 1 1 calc R . .

H7C H 0.4086 0.9786 0.1820 0.052 Uiso 1 1 calc R . .

C8 C 0.3134(5) 1.0820(3) 0.4362(2) 0.0529(13) Uani 1 1 d . . .

H8A H 0.3652 1.1437 0.4455 0.079 Uiso 1 1 calc R . .

H8B H 0.3214 1.0514 0.4771 0.079 Uiso 1 1 calc R . .

H8C H 0.2169 1.0924 0.4171 0.079 Uiso 1 1 calc R . .

C9 C 0.5138(4) 0.7707(3) 0.37774(19) 0.0370(10) Uani 1 1 d . . .

H9A H 0.5034 0.7623 0.4222 0.056 Uiso 1 1 calc R . .

H9B H 0.6106 0.7671 0.3767 0.056 Uiso 1 1 calc R . .

H9C H 0.4601 0.7200 0.3469 0.056 Uiso 1 1 calc R . .

C10 C 0.7923(3) 0.8541(2) 0.31099(16) 0.0235(8) Uani 1 1 d . . .

C11 C 0.7946(4) 0.9404(3) 0.34966(18) 0.0296(9) Uani 1 1 d . . .

H11 H 0.7232 0.9836 0.3388 0.036 Uiso 1 1 calc R . .

C12 C 0.9020(4) 0.9624(3) 0.40404(18) 0.0377(10) Uani 1 1 d . . .

H12 H 0.9036 1.0207 0.4307 0.045 Uiso 1 1 calc R . .

C13 C 1.0053(4) 0.9007(3) 0.41951(19) 0.0416(11) Uani 1 1 d . . .

H13 H 1.0791 0.9170 0.4565 0.050 Uiso 1 1 calc R . .

C14 C 1.0039(4) 0.8153(3) 0.38210(19) 0.0377(10) Uani 1 1 d . . .

H14 H 1.0759 0.7727 0.3936 0.045 Uiso 1 1 calc R . .

C15 C 0.8981(4) 0.7915(3) 0.32787(17) 0.0287(9) Uani 1 1 d . . .

H15 H 0.8971 0.7325 0.3020 0.034 Uiso 1 1 calc R . .

C16 C 0.6949(4) 0.8989(2) 0.17787(16) 0.0240(8) Uani 1 1 d . . .

C17 C 0.8071(4) 0.9631(2) 0.18971(18) 0.0301(9) Uani 1 1 d . . .

H17 H 0.8703 0.9688 0.2313 0.036 Uiso 1 1 calc R . .

C18 C 0.8269(4) 1.0188(3) 0.1409(2) 0.0410(10) Uani 1 1 d . . .

H18 H 0.9029 1.0635 0.1495 0.049 Uiso 1 1 calc R . .

C19 C 0.7379(5) 1.0101(3) 0.0805(2) 0.0466(11) Uani 1 1 d . . .

H19 H 0.7527 1.0487 0.0474 0.056 Uiso 1 1 calc R . .

C20 C 0.6274(4) 0.9460(3) 0.06735(19) 0.0388(10) Uani 1 1 d . . .

H20 H 0.5663 0.9398 0.0252 0.047 Uiso 1 1 calc R . .

C21 C 0.6057(4) 0.8907(3) 0.11566(17) 0.0304(9) Uani 1 1 d . . .

H21 H 0.5292 0.8464 0.1066 0.037 Uiso 1 1 calc R . .

C22 C 0.6614(3) 0.7050(2) 0.20481(16) 0.0208(8) Uani 1 1 d . . .

C23 C 0.7489(3) 0.6662(2) 0.16296(16) 0.0211(8) Uani 1 1 d . . .

C24 C 0.8213(3) 0.7068(3) 0.12196(16) 0.0250(8) Uani 1 1 d . . .

H24 H 0.8221 0.7740 0.1186 0.030 Uiso 1 1 calc R . .

C25 C 0.8915(4) 0.6487(3) 0.08646(17) 0.0275(8) Uani 1 1 d . . .

H25 H 0.9428 0.6765 0.0594 0.033 Uiso 1 1 calc R . .

C26 C 0.8889(3) 0.5496(3) 0.08936(17) 0.0273(8) Uani 1 1 d . . .

H26 H 0.9358 0.5108 0.0633 0.033 Uiso 1 1 calc R . .

C27 C 0.8190(3) 0.5078(3) 0.12954(16) 0.0255(8) Uani 1 1 d . . .

H27 H 0.8179 0.4403 0.1316 0.031 Uiso 1 1 calc R . .

C28 C 0.7494(3) 0.5654(2) 0.16752(15) 0.0205(8) Uani 1 1 d . . .

C29 C 0.6698(3) 0.5416(2) 0.21353(16) 0.0210(8) Uani 1 1 d . . .

C30 C 0.6207(3) 0.6255(2) 0.23593(16) 0.0203(8) Uani 1 1 d . . .

H30 H 0.562(3) 0.634(2) 0.2682(15) 0.013(8) Uiso 1 1 d . . .

C31 C 0.8857(3) 0.3606(3) 0.31781(16) 0.0237(8) Uani 1 1 d . . .

C32 C 0.9588(3) 0.4391(3) 0.35842(17) 0.0258(8) Uani 1 1 d . . .

C33 C 1.0464(4) 0.4229(3) 0.41753(17) 0.0279(8) Uani 1 1 d . . .

H33 H 1.0906 0.4766 0.4456 0.033 Uiso 1 1 calc R . .

C34 C 1.0727(4) 0.3323(3) 0.43783(17) 0.0301(9) Uani 1 1 d . . .

C35 C 1.0066(4) 0.2553(3) 0.39557(18) 0.0313(9) Uani 1 1 d . . .

H35 H 1.0252 0.1921 0.4071 0.038 Uiso 1 1 calc R . .

C36 C 0.9141(4) 0.2683(3) 0.33694(18) 0.0273(8) Uani 1 1 d . . .

C37 C 0.8413(4) 0.1825(3) 0.29437(19) 0.0397(10) Uani 1 1 d . . .

H37A H 0.7446 0.1805 0.2960 0.060 Uiso 1 1 calc R . .

H37B H 0.8832 0.1240 0.3104 0.060 Uiso 1 1 calc R . .

H37C H 0.8486 0.1870 0.2490 0.060 Uiso 1 1 calc R . .

C38 C 1.1700(4) 0.3179(3) 0.50194(19) 0.0431(11) Uani 1 1 d . . .

H38A H 1.2639 0.3182 0.4960 0.065 Uiso 1 1 calc R . .

H38B H 1.1474 0.2563 0.5167 0.065 Uiso 1 1 calc R . .

H38C H 1.1621 0.3697 0.5349 0.065 Uiso 1 1 calc R . .

C39 C 0.9484(4) 0.5389(3) 0.33716(19) 0.0329(9) Uani 1 1 d . . .

H39A H 0.8608 0.5643 0.3418 0.049 Uiso 1 1 calc R . .

H39B H 0.9540 0.5376 0.2911 0.049 Uiso 1 1 calc R . .

H39C H 1.0237 0.5800 0.3647 0.049 Uiso 1 1 calc R . .

C40 C 0.5519(3) 0.3556(2) 0.16569(16) 0.0225(8) Uani 1 1 d . . .

C41 C 0.5655(4) 0.2584(3) 0.15416(17) 0.0332(9) Uani 1 1 d . . .

H41 H 0.6388 0.2279 0.1809 0.040 Uiso 1 1 calc R . .

C42 C 0.4734(4) 0.2047(3) 0.10395(18) 0.0399(10) Uani 1 1 d . . .

H42 H 0.4817 0.1375 0.0973 0.048 Uiso 1 1 calc R . .

C43 C 0.3699(4) 0.2490(3) 0.06389(18) 0.0384(10) Uani 1 1 d . . .

H43 H 0.3070 0.2123 0.0294 0.046 Uiso 1 1 calc R . .

C44 C 0.3573(4) 0.3459(3) 0.07360(18) 0.0351(10) Uani 1 1 d . . .

H44 H 0.2860 0.3763 0.0456 0.042 Uiso 1 1 calc R . .

C45 C 0.4489(4) 0.3999(3) 0.12436(17) 0.0287(9) Uani 1 1 d . . .

H45 H 0.4407 0.4671 0.1306 0.034 Uiso 1 1 calc R . .

C46 C 0.5556(3) 0.4285(2) 0.29848(16) 0.0214(8) Uani 1 1 d . . .

C47 C 0.4472(4) 0.3619(3) 0.29373(18) 0.0304(9) Uani 1 1 d . . .

H47 H 0.4254 0.3140 0.2578 0.037 Uiso 1 1 calc R . .

C48 C 0.3718(4) 0.3654(3) 0.34116(19) 0.0380(10) Uani 1 1 d . . .

H48 H 0.2983 0.3198 0.3376 0.046 Uiso 1 1 calc R . .

C49 C 0.4024(4) 0.4342(3) 0.39328(18) 0.0333(9) Uani 1 1 d . . .

H49 H 0.3486 0.4371 0.4250 0.040 Uiso 1 1 calc R . .

C50 C 0.5108(4) 0.4992(3) 0.39978(17) 0.0320(9) Uani 1 1 d . . .

H50 H 0.5325 0.5461 0.4363 0.038 Uiso 1 1 calc R . .

C51 C 0.5877(4) 0.4959(2) 0.35318(16) 0.0253(8) Uani 1 1 d . . .

H51 H 0.6634 0.5401 0.3583 0.030 Uiso 1 1 calc R . .

C52 C 0.2026(5) 0.8526(3) 0.0689(2) 0.0570(13) Uani 1 1 d . . .

H52A H 0.1040 0.8439 0.0499 0.085 Uiso 1 1 calc R . .

H52B H 0.2519 0.8098 0.0440 0.085 Uiso 1 1 calc R . .

H52C H 0.2321 0.9192 0.0670 0.085 Uiso 1 1 calc R . .

C53 C 0.1450(4) 0.8848(3) 0.1722(2) 0.0566(13) Uani 1 1 d . . .

H53A H 0.1617 0.9534 0.1696 0.085 Uiso 1 1 calc R . .

H53B H 0.1662 0.8709 0.2183 0.085 Uiso 1 1 calc R . .

H53C H 0.0487 0.8670 0.1521 0.085 Uiso 1 1 calc R . .

C54 C 0.4563(4) 0.6344(3) 0.04496(18) 0.0372(10) Uani 1 1 d . . .

H54A H 0.4678 0.5654 0.0385 0.056 Uiso 1 1 calc R . .

H54B H 0.5462 0.6675 0.0617 0.056 Uiso 1 1 calc R . .

H54C H 0.4118 0.6580 0.0030 0.056 Uiso 1 1 calc R . .

C55 C 0.2336(4) 0.6108(3) 0.06545(18) 0.0357(10) Uani 1 1 d . . .

H55A H 0.1940 0.6367 0.0236 0.054 Uiso 1 1 calc R . .

H55B H 0.1763 0.6262 0.0965 0.054 Uiso 1 1 calc R . .

H55C H 0.2379 0.5411 0.0582 0.054 Uiso 1 1 calc R . .

C56 C 0.2318(4) 0.5516(3) 0.2213(2) 0.0440(11) Uani 1 1 d . . .

H56A H 0.2583 0.5235 0.2634 0.066 Uiso 1 1 calc R . .

H56B H 0.2811 0.5215 0.1904 0.066 Uiso 1 1 calc R . .

H56C H 0.1330 0.5408 0.2035 0.066 Uiso 1 1 calc R . .

C57 C 0.1940(5) 0.6983(3) 0.2775(2) 0.0513(12) Uani 1 1 d . . .

H57A H 0.0951 0.6882 0.2600 0.077 Uiso 1 1 calc R . .

H57B H 0.2179 0.7671 0.2843 0.077 Uiso 1 1 calc R . .

H57C H 0.2208 0.6699 0.3194 0.077 Uiso 1 1 calc R . .

C58 C 0.072(5) 0.3024(18) 0.1775(10) 0.067(9) Uani 0.36(5) 1 d PDU A 1

H58A H 0.0024 0.3270 0.2007 0.080 Uiso 0.36(5) 1 calc PR A 1

H58B H 0.1451 0.3527 0.1829 0.080 Uiso 0.36(5) 1 calc PR A 1

Cl1 Cl -0.004(3) 0.2768(13) 0.0951(7) 0.098(5) Uani 0.36(5) 1 d PDU A 1

Cl2 Cl 0.1413(18) 0.1984(11) 0.2124(7) 0.073(5) Uani 0.36(5) 1 d PDU A 1

C58' C 0.044(2) 0.2986(10) 0.1775(5) 0.042(3) Uani 0.64(5) 1 d PDU A 2

H58C H -0.0253 0.3169 0.2027 0.051 Uiso 0.64(5) 1 calc PR A 2

H58D H 0.1071 0.3547 0.1803 0.051 Uiso 0.64(5) 1 calc PR A 2

Cl1' Cl -0.0381(15) 0.2677(4) 0.0960(3) 0.062(2) Uani 0.64(5) 1 d PDU A 2

Cl2' Cl 0.1361(9) 0.2030(6) 0.2129(3) 0.055(2) Uani 0.64(5) 1 d PDU A 2

C59 C 0.695(4) 0.289(3) 0.4416(16) 0.032(6) Uani 0.51(7) 1 d PU . 1

H59A H 0.6186 0.3172 0.4112 0.038 Uiso 0.51(7) 1 calc PR . 1

H59B H 0.7797 0.3027 0.4271 0.038 Uiso 0.51(7) 1 calc PR . 1

Cl3 Cl 0.2882(14) 0.6519(10) 0.4754(6) 0.057(3) Uani 0.51(7) 1 d PDU . 1

Cl4 Cl 0.332(3) 0.8215(16) 0.5647(8) 0.070(4) Uani 0.51(7) 1 d PDU . 1

C59' C 0.727(4) 0.302(3) 0.452(2) 0.035(6) Uani 0.49(7) 1 d PU . 2

H59C H 0.8235 0.3153 0.4503 0.043 Uiso 0.49(7) 1 calc PR . 2

H59D H 0.6671 0.3334 0.4166 0.043 Uiso 0.49(7) 1 calc PR . 2

Cl3' Cl 0.2973(14) 0.6556(9) 0.4751(6) 0.050(3) Uani 0.49(7) 1 d PDU . 2

Cl4' Cl 0.3123(19) 0.8338(13) 0.5609(6) 0.049(2) Uani 0.49(7) 1 d PDU . 2

 

loop_

 _atom_site_aniso_label

 _atom_site_aniso_U_11

 _atom_site_aniso_U_22

 _atom_site_aniso_U_33

 _atom_site_aniso_U_23

 _atom_site_aniso_U_13

 _atom_site_aniso_U_12

Zr1 0.0225(2) 0.0231(2) 0.0268(2) -0.00021(15) 0.00684(14) -0.00096(14)

P1 0.0216(5) 0.0156(5) 0.0224(5) 0.0019(4) 0.0049(4) -0.0006(4)

P2 0.0239(5) 0.0167(5) 0.0216(5) 0.0006(4) 0.0052(4) -0.0009(4)

N1 0.0234(16) 0.0183(15) 0.0239(16) 0.0011(12) 0.0063(12) 0.0034(12)

N2 0.0269(17) 0.0197(16) 0.0253(16) 0.0017(13) 0.0053(13) 0.0032(12)

N3 0.0274(18) 0.0324(19) 0.043(2) 0.0018(16) -0.0005(15) 0.0014(14)

N4 0.0243(17) 0.0380(19) 0.0241(17) -0.0023(14) 0.0034(13) -0.0015(14)

N5 0.0278(18) 0.0309(19) 0.0364(19) 0.0005(15) 0.0121(14) -0.0044(14)

C1 0.0187(19) 0.0205(19) 0.030(2) 0.0002(16) 0.0064(15) 0.0013(15)

C2 0.025(2) 0.029(2) 0.026(2) 0.0008(17) 0.0029(15) 0.0010(16)

C3 0.030(2) 0.047(3) 0.029(2) -0.0030(19) 0.0103(17) 0.0004(19)

C4 0.030(2) 0.040(3) 0.040(2) -0.011(2) 0.0054(18) 0.0063(19)

C5 0.028(2) 0.029(2) 0.043(3) -0.0095(19) 0.0022(18) 0.0045(17)

C6 0.020(2) 0.024(2) 0.035(2) -0.0035(17) 0.0007(16) 0.0019(15)

C7 0.041(2) 0.024(2) 0.040(2) 0.0074(18) 0.0099(18) 0.0105(17)

C8 0.050(3) 0.053(3) 0.053(3) -0.021(2) 0.014(2) 0.013(2)

C9 0.045(3) 0.038(2) 0.035(2) 0.0113(19) 0.0180(19) 0.0056(19)

C10 0.025(2) 0.0216(19) 0.0240(19) 0.0017(15) 0.0078(15) -0.0018(15)

C11 0.029(2) 0.022(2) 0.037(2) 0.0019(17) 0.0060(17) 0.0017(16)

C12 0.044(3) 0.034(2) 0.031(2) -0.0090(18) 0.0055(19) -0.0054(19)

C13 0.037(2) 0.051(3) 0.029(2) -0.001(2) -0.0089(18) -0.003(2)

C14 0.029(2) 0.043(3) 0.039(2) 0.003(2) 0.0021(18) 0.0065(18)

C15 0.026(2) 0.029(2) 0.029(2) -0.0012(17) 0.0030(16) 0.0028(16)

C16 0.029(2) 0.0205(19) 0.025(2) 0.0022(15) 0.0108(16) 0.0033(16)

C17 0.040(2) 0.020(2) 0.032(2) -0.0006(17) 0.0124(17) -0.0023(17)

C18 0.054(3) 0.028(2) 0.048(3) 0.004(2) 0.025(2) -0.006(2)

C19 0.071(3) 0.037(3) 0.043(3) 0.019(2) 0.028(2) 0.005(2)

C20 0.050(3) 0.039(3) 0.028(2) 0.0057(19) 0.0094(19) 0.010(2)

C21 0.031(2) 0.029(2) 0.030(2) 0.0026(17) 0.0052(17) 0.0027(17)

C22 0.0217(19) 0.0168(18) 0.0233(19) -0.0001(15) 0.0048(14) -0.0019(14)

C23 0.0166(18) 0.0215(19) 0.0240(19) 0.0036(15) 0.0019(14) -0.0031(14)

C24 0.024(2) 0.0211(19) 0.029(2) 0.0015(16) 0.0051(16) -0.0034(15)

C25 0.026(2) 0.034(2) 0.024(2) 0.0054(17) 0.0080(16) -0.0021(17)

C26 0.023(2) 0.030(2) 0.030(2) -0.0013(17) 0.0101(16) 0.0021(16)

C27 0.028(2) 0.0205(19) 0.027(2) 0.0000(16) 0.0048(16) 0.0020(15)

C28 0.0177(18) 0.0218(19) 0.0201(18) -0.0013(15) 0.0020(14) -0.0009(14)

C29 0.0203(19) 0.0184(18) 0.0230(19) 0.0010(15) 0.0028(14) -0.0004(14)

C30 0.0180(18) 0.023(2) 0.0193(19) 0.0017(15) 0.0038(15) -0.0001(15)

C31 0.0199(19) 0.028(2) 0.026(2) 0.0008(16) 0.0103(15) 0.0010(15)

C32 0.023(2) 0.024(2) 0.032(2) -0.0001(16) 0.0102(16) -0.0016(15)

C33 0.023(2) 0.029(2) 0.030(2) -0.0016(17) 0.0048(16) -0.0071(16)

C34 0.023(2) 0.039(2) 0.028(2) 0.0044(18) 0.0029(16) -0.0018(17)

C35 0.030(2) 0.029(2) 0.035(2) 0.0093(18) 0.0077(17) 0.0027(17)

C36 0.027(2) 0.021(2) 0.035(2) -0.0008(16) 0.0109(17) 0.0017(15)

C37 0.055(3) 0.019(2) 0.039(2) 0.0003(18) 0.002(2) 0.0017(18)

C38 0.039(3) 0.050(3) 0.036(2) 0.010(2) -0.0020(19) -0.005(2)

C39 0.027(2) 0.028(2) 0.041(2) 0.0019(18) 0.0025(17) -0.0060(17)

C40 0.027(2) 0.0209(19) 0.0205(19) 0.0009(15) 0.0075(15) -0.0037(15)

C41 0.046(3) 0.022(2) 0.027(2) 0.0030(17) -0.0014(18) 0.0014(18)

C42 0.058(3) 0.023(2) 0.034(2) -0.0023(18) 0.003(2) -0.0023(19)

C43 0.047(3) 0.035(2) 0.026(2) -0.0088(18) 0.0004(18) -0.011(2)

C44 0.031(2) 0.037(2) 0.030(2) -0.0012(18) -0.0070(17) 0.0023(18)

C45 0.032(2) 0.025(2) 0.028(2) -0.0011(16) 0.0057(16) 0.0023(16)

C46 0.0231(19) 0.0191(19) 0.0211(19) 0.0050(15) 0.0024(14) -0.0003(15)

C47 0.031(2) 0.031(2) 0.028(2) 0.0008(17) 0.0066(17) -0.0046(17)

C48 0.035(2) 0.042(3) 0.039(2) 0.006(2) 0.0124(19) -0.0139(19)

C49 0.036(2) 0.041(2) 0.029(2) 0.0082(18) 0.0176(17) 0.0038(19)

C50 0.040(2) 0.032(2) 0.025(2) -0.0008(17) 0.0106(17) 0.0017(18)

C51 0.026(2) 0.021(2) 0.027(2) 0.0022(16) 0.0041(16) -0.0033(15)

C52 0.066(3) 0.042(3) 0.054(3) 0.014(2) -0.009(2) 0.010(2)

C53 0.036(3) 0.047(3) 0.083(4) -0.005(3) 0.009(2) 0.008(2)

C54 0.030(2) 0.051(3) 0.030(2) -0.0067(19) 0.0085(17) 0.0023(19)

C55 0.028(2) 0.040(2) 0.035(2) -0.0070(19) 0.0016(17) 0.0006(18)

C56 0.040(3) 0.035(3) 0.061(3) 0.011(2) 0.017(2) -0.0015(19)

C57 0.054(3) 0.049(3) 0.057(3) -0.009(2) 0.032(2) -0.013(2)

C58 0.037(14) 0.032(10) 0.112(13) -0.021(10) -0.013(12) 0.005(9)

Cl1 0.076(7) 0.158(13) 0.074(5) 0.027(5) 0.035(5) 0.044(5)

Cl2 0.054(9) 0.038(6) 0.120(10) 0.018(6) 0.005(6) -0.003(5)

C58' 0.047(9) 0.036(6) 0.047(5) 0.000(5) 0.018(5) -0.001(5)

Cl1' 0.086(4) 0.052(3) 0.042(2) -0.0006(14) 0.000(2) 0.023(2)

Cl2' 0.040(4) 0.059(4) 0.054(3) -0.004(2) -0.012(2) 0.010(3)

C59 0.028(11) 0.046(14) 0.019(7) -0.007(7) 0.004(7) 0.001(10)

Cl3 0.068(5) 0.058(5) 0.034(5) -0.004(4) -0.002(4) -0.013(4)

Cl4 0.088(8) 0.036(4) 0.093(6) -0.012(3) 0.040(5) -0.016(5)

C59' 0.030(11) 0.025(8) 0.050(16) 0.001(10) 0.009(10) -0.009(9)

Cl3' 0.061(5) 0.046(5) 0.050(6) -0.001(4) 0.026(5) 0.012(4)

Cl4' 0.059(4) 0.041(4) 0.048(5) -0.002(2) 0.018(3) 0.003(3)

 

_geom_special_details

;

 All esds (except the esd in the dihedral angle between two l.s. planes)

 are estimated using the full covariance matrix.  The cell esds are taken

 into account individually in the estimation of esds in distances, angles

 and torsion angles; correlations between esds in cell parameters are only

 used when they are defined by crystal symmetry.  An approximate (isotropic)

 treatment of cell esds is used for estimating esds involving l.s. planes.

;

 

loop_

 _geom_bond_atom_site_label_1

 _geom_bond_atom_site_label_2

 _geom_bond_distance

 _geom_bond_site_symmetry_2

 _geom_bond_publ_flag

Zr1 N4 2.020(3) . ?

Zr1 N5 2.033(3) . ?

Zr1 N3 2.045(3) . ?

Zr1 N1 2.224(3) . ?

Zr1 P1 3.1529(10) . ?

P1 N1 1.615(3) . ?

P1 C22 1.735(3) . ?

P1 C10 1.801(3) . ?

P1 C16 1.805(4) . ?

P2 N2 1.562(3) . ?

P2 C29 1.786(3) . ?

P2 C40 1.814(3) . ?

P2 C46 1.823(3) . ?

N1 C1 1.439(4) . ?

N2 C31 1.404(4) . ?

N3 C52 1.460(5) . ?

N3 C53 1.461(5) . ?

N4 C55 1.461(4) . ?

N4 C54 1.462(4) . ?

N5 C56 1.445(5) . ?

N5 C57 1.450(5) . ?

C1 C6 1.397(5) . ?

C1 C2 1.405(5) . ?

C2 C3 1.399(5) . ?

C2 C9 1.491(5) . ?

C3 C4 1.377(5) . ?

C4 C5 1.383(6) . ?

C4 C8 1.525(5) . ?

C5 C6 1.397(5) . ?

C6 C7 1.501(5) . ?

C10 C15 1.396(5) . ?

C10 C11 1.397(5) . ?

C11 C12 1.386(5) . ?

C12 C13 1.366(6) . ?

C13 C14 1.376(5) . ?

C14 C15 1.379(5) . ?

C16 C17 1.388(5) . ?

C16 C21 1.399(5) . ?

C17 C18 1.385(5) . ?

C18 C19 1.369(6) . ?

C19 C20 1.374(6) . ?

C20 C21 1.380(5) . ?

C22 C30 1.435(5) . ?

C22 C23 1.463(4) . ?

C23 C24 1.395(5) . ?

C23 C28 1.425(5) . ?

C24 C25 1.374(5) . ?

C25 C26 1.396(5) . ?

C26 C27 1.372(5) . ?

C27 C28 1.399(4) . ?

C28 C29 1.443(5) . ?

C29 C30 1.375(5) . ?

C31 C36 1.403(5) . ?

C31 C32 1.414(5) . ?

C32 C33 1.386(5) . ?

C32 C39 1.502(5) . ?

C33 C34 1.385(5) . ?

C34 C35 1.390(5) . ?

C34 C38 1.503(5) . ?

C35 C36 1.390(5) . ?

C36 C37 1.504(5) . ?

C40 C41 1.380(5) . ?

C40 C45 1.385(5) . ?

C41 C42 1.386(5) . ?

C42 C43 1.374(5) . ?

C43 C44 1.370(5) . ?

C44 C45 1.393(5) . ?

C46 C51 1.398(4) . ?

C46 C47 1.398(5) . ?

C47 C48 1.383(5) . ?

C48 C49 1.372(5) . ?

C49 C50 1.378(5) . ?

C50 C51 1.379(5) . ?

C58 Cl1 1.727(15) . ?

C58 Cl2 1.773(14) . ?

C58' Cl1' 1.735(8) . ?

C58' Cl2' 1.765(9) . ?

C59 Cl4 1.55(5) 2_666 ?

C59 Cl3 1.84(3) 2_666 ?

Cl3 C59 1.84(3) 2_666 ?

Cl4 C59 1.55(5) 2_666 ?

C59' Cl3' 1.67(4) 2_666 ?

C59' Cl4' 1.91(5) 2_666 ?

Cl3' C59' 1.67(4) 2_666 ?

Cl4' C59' 1.91(5) 2_666 ?

 

loop_

 _geom_angle_atom_site_label_1

 _geom_angle_atom_site_label_2

 _geom_angle_atom_site_label_3

 _geom_angle

 _geom_angle_site_symmetry_1

 _geom_angle_site_symmetry_3

 _geom_angle_publ_flag

N4 Zr1 N5 110.56(12) . . ?

N4 Zr1 N3 97.94(12) . . ?

N5 Zr1 N3 106.54(13) . . ?

N4 Zr1 N1 135.55(11) . . ?

N5 Zr1 N1 104.73(11) . . ?

N3 Zr1 N1 97.03(11) . . ?

N4 Zr1 P1 107.24(8) . . ?

N5 Zr1 P1 120.70(9) . . ?

N3 Zr1 P1 111.52(9) . . ?

N1 Zr1 P1 28.90(7) . . ?

N1 P1 C22 103.41(15) . . ?

N1 P1 C10 112.96(15) . . ?

C22 P1 C10 114.36(16) . . ?

N1 P1 C16 113.50(16) . . ?

C22 P1 C16 107.27(16) . . ?

C10 P1 C16 105.43(16) . . ?

N1 P1 Zr1 41.70(10) . . ?

C22 P1 Zr1 66.88(11) . . ?

C10 P1 Zr1 146.94(11) . . ?

C16 P1 Zr1 105.30(12) . . ?

N2 P2 C29 118.17(16) . . ?

N2 P2 C40 107.28(15) . . ?

C29 P2 C40 104.42(16) . . ?

N2 P2 C46 114.58(15) . . ?

C29 P2 C46 106.24(15) . . ?

C40 P2 C46 104.92(15) . . ?

C1 N1 P1 125.6(2) . . ?

C1 N1 Zr1 124.9(2) . . ?

P1 N1 Zr1 109.40(13) . . ?

C31 N2 P2 132.6(2) . . ?

C52 N3 C53 109.3(4) . . ?

C52 N3 Zr1 125.6(3) . . ?

C53 N3 Zr1 124.9(3) . . ?

C55 N4 C54 110.0(3) . . ?

C55 N4 Zr1 105.9(2) . . ?

C54 N4 Zr1 143.3(2) . . ?

C56 N5 C57 109.9(3) . . ?

C56 N5 Zr1 126.6(2) . . ?

C57 N5 Zr1 122.4(3) . . ?

C6 C1 C2 120.9(3) . . ?

C6 C1 N1 120.9(3) . . ?

C2 C1 N1 118.0(3) . . ?

C3 C2 C1 117.9(3) . . ?

C3 C2 C9 120.3(3) . . ?

C1 C2 C9 121.8(3) . . ?

C4 C3 C2 122.7(4) . . ?

C3 C4 C5 117.7(3) . . ?

C3 C4 C8 121.2(4) . . ?

C5 C4 C8 121.1(4) . . ?

C4 C5 C6 122.7(4) . . ?

C1 C6 C5 118.0(3) . . ?

C1 C6 C7 122.4(3) . . ?

C5 C6 C7 119.5(3) . . ?

C15 C10 C11 119.4(3) . . ?

C15 C10 P1 118.3(3) . . ?

C11 C10 P1 122.2(3) . . ?

C12 C11 C10 119.5(3) . . ?

C13 C12 C11 120.4(4) . . ?

C12 C13 C14 120.7(4) . . ?

C13 C14 C15 120.0(4) . . ?

C14 C15 C10 120.0(3) . . ?

C17 C16 C21 118.5(3) . . ?

C17 C16 P1 123.6(3) . . ?

C21 C16 P1 117.9(3) . . ?

C18 C17 C16 120.0(4) . . ?

C19 C18 C17 120.6(4) . . ?

C18 C19 C20 120.4(4) . . ?

C19 C20 C21 119.6(4) . . ?

C20 C21 C16 120.8(4) . . ?

C30 C22 C23 105.9(3) . . ?

C30 C22 P1 122.1(2) . . ?

C23 C22 P1 127.4(3) . . ?

C24 C23 C28 119.5(3) . . ?

C24 C23 C22 133.7(3) . . ?

C28 C23 C22 106.8(3) . . ?

C25 C24 C23 119.3(3) . . ?

C24 C25 C26 121.3(3) . . ?

C27 C26 C25 120.6(3) . . ?

C26 C27 C28 119.4(3) . . ?

C27 C28 C23 119.9(3) . . ?

C27 C28 C29 131.3(3) . . ?

C23 C28 C29 108.8(3) . . ?

C30 C29 C28 107.4(3) . . ?

C30 C29 P2 130.5(3) . . ?

C28 C29 P2 121.8(2) . . ?

C29 C30 C22 110.9(3) . . ?

C36 C31 N2 117.8(3) . . ?

C36 C31 C32 117.9(3) . . ?

N2 C31 C32 124.1(3) . . ?

C33 C32 C31 119.2(3) . . ?

C33 C32 C39 119.5(3) . . ?

C31 C32 C39 121.2(3) . . ?

C34 C33 C32 123.3(3) . . ?

C33 C34 C35 116.8(3) . . ?

C33 C34 C38 121.6(3) . . ?

C35 C34 C38 121.6(4) . . ?

C36 C35 C34 121.8(4) . . ?

C35 C36 C31 120.7(3) . . ?

C35 C36 C37 119.6(3) . . ?

C31 C36 C37 119.7(3) . . ?

C41 C40 C45 119.1(3) . . ?

C41 C40 P2 120.6(3) . . ?

C45 C40 P2 120.2(3) . . ?

C40 C41 C42 120.6(4) . . ?

C43 C42 C41 119.9(4) . . ?

C44 C43 C42 120.2(4) . . ?

C43 C44 C45 120.2(4) . . ?

C40 C45 C44 120.0(3) . . ?

C51 C46 C47 118.3(3) . . ?

C51 C46 P2 120.9(3) . . ?

C47 C46 P2 120.7(3) . . ?

C48 C47 C46 120.2(3) . . ?

C49 C48 C47 120.4(4) . . ?

C48 C49 C50 120.4(3) . . ?

C49 C50 C51 119.8(3) . . ?

C50 C51 C46 120.9(3) . . ?

Cl1 C58 Cl2 110.6(13) . . ?

Cl1' C58' Cl2' 111.6(7) . . ?

Cl4 C59 Cl3 115(2) 2_666 2_666 ?

Cl3' C59' Cl4' 110(2) 2_666 2_666 ?

 

_diffrn_measured_fraction_theta_max    0.976

_diffrn_reflns_theta_full              24.71

_diffrn_measured_fraction_theta_full   0.976

_refine_diff_density_max    0.587

_refine_diff_density_min   -0.423

_refine_diff_density_rms    0.069
